# Supplementary material for: Character drawing style in cartoons on empathy induction: an eye-tracking and EEG study
Source: PeerJ. 2017 Nov 8;5:e3988. doi: 10.7717/peerj.3988 (PMC5687150; doi:10.7717/peerj.3988)
Supplement: Data S1 [file peerj-05-3988-s001.xlsx]

## Sheet: Behavior & Eye-tracking
	General Empathy Scale																																								Induced Empathy Score					Eye-tracking
	ID	G: M / F	Age	1	2	3	4	5	6	7	8	9	10	11	12	13	14	15	16	17	18	19	20	21	22	23	24	25	26	27	28	29	30	suffering	positive sharing	responsive crying	emotional attention	feel for others	emotional contagion	overall GES	1=Empathied, 2=Not	self-other awareness	perspective-taking	affective-sharing	overall IES	Time to First Fixation A	Time to First Fixation B	First Fixation Length A	First Fixation Length B
Iconinc	2	1	27	2	4	5	2	5	5	3	4	3	4	3	4	2	5	3	2	4	5	4	5	4	4	5	5	2	3	2	4	5	4	4.625	4.6	1.66667	3.75	3.8	3.4	3.64028	1	1	6	6	4.33333	0.117	0.416	1.565	0.557
Style	4	2	28	2	5	4	3	4	3	2	5	2	4	4	5	3	4	4	2	4	4	3	4	2	4	4	4	1	4	3	4	4	3	4.125	3.8	1.66667	3.25	3.4	3.8	3.34028	1	2	4	4	3.33333	0.316	0.167	0.288	0.951
	5	1	25	4	2	5	2	4	4	4	5	4	4	3	1	2	4	1	2	4	5	4	2	4	4	4	5	4	2	2	4	5	4	4.125	4.2	4	3.5	3.4	3	3.70417	1	5	5	6	5.33333	0.733	0.349	0.582	0.787
	6	1	29	3	5	4	2	5	4	4	5	2	4	3	4	2	4	3	2	4	4	3	4	4	4	5	5	3	4	4	5	5	4	4.5	4.4	2.66667	3.5	3.6	4	3.77778	1	5	6	7	6	0.333	0.349	0.277	0.506
	7	1	24	4	4	4	2	5	4	3	4	3	3	4	4	2	4	3	2	3	4	4	3	4	4	4	4	4	3	2	2	4	4	3.875	4	3.66667	3.75	3.6	3.4	3.71528	1	4	4	5	4.33333	0.183	0.017	0.418	0.919
	16	1	28	4	5	5	1	5	5	4	3	1	4	4	4	1	3	3	3	3	5	5	1	5	4	4	5	4	4	1	5	5	4	4.625	4	4.33333	5	4	4	4.32639	1	5	6	7	6	0.233	0.449	0.559	0.502
	17	2	25	3	4	4	2	3	3	4	4	2	3	4	3	2	4	3	2	3	4	3	3	3	4	3	3	3	4	3	4	4	3	3.5	3.6	3	3.75	3.2	3.8	3.475	1	4	5	7	5.33333	0.333	0.199	1.064	1.015
	18	2	28	3	4	4	2	4	5	3	4	2	4	4	4	2	2	3	2	3	4	3	5	3	2	2	3	4	4	4	4	4	4	4	2.8	2.66667	3.5	3.4	3.6	3.32778	1	2	5	5	4	0.133	0.366	0.868	0.763
	20	2	26	4	5	5	1	4	4	2	5	1	2	4	5	1	4	4	3	4	4	4	2	2	3	3	4	4	2	1	4	4	3	4.375	3.4	4	5	3	3.4	3.8625	1	5	6	6	5.66667	0.266	0.183	0.308	0.926
	22	1	29	5	5	5	5	5	5	5	5	3	5	5	5	1	5	5	1	5	5	5	3	5	5	5	5	5	5	1	5	5	5	5	5	4.33333	3.5	5	5	4.63889	1	6	7	7	6.66667	0.283	0.383	0.963	0.422
	23	1	26	4	4	3	1	5	5	4	5	2	4	4	4	2	4	3	2	3	4	2	2	1	4	5	4	4	4	1	4	4	4	4.25	4.2	4	4.5	2.8	3.8	3.925	1	4	4	5	4.33333	0.316	0.167	0.646	0.589
	26	1	28	3	5	5	3	4	4	5	4	2	5	5	3	4	5	5	1	4	3	5	1	2	3	5	3	3	3	3	5	5	5	3.875	4.6	3.66667	3	4.4	4.4	3.99028	1	5	5	5	5	0.233	0.299	0.258	1.052
	28	1	23	4	5	2	2	4	3	3	3	3	3	4	4	2	4	3	2	3	4	3	3	3	4	4	3	4	3	3	4	3	4	3.375	3.8	3.66667	3.5	3.2	3.6	3.52361	1	3	3	3	3	0.249	0.266	0.382	0.609
	29	1	22	4	4	3	1	4	4	4	3	2	4	4	3	2	4	4	2	3	4	4	3	3	4	4	3	3	4	2	4	4	4	3.5	4	3.33333	4.25	3.8	3.8	3.78056	1	4	5	4	4.33333	0.316	0.399	0.876	1.302
	30	1	28	2	3	3	2	4	4	3	3	3	3	4	4	3	4	2	3	2	3	3	4	3	4	4	3	2	3	2	4	4	4	3.5	4	2	3.5	2.8	3	3.13333	1	4	5	4	4.33333	0.266	0.299	0.414	1.261
	31	1	26	4	4	3	2	4	3	3	2	3	1	2	2	2	4	2	4	1	5	3	3	1	4	4	2	2	1	3	4	5	3	3.125	4	3	3.5	1.8	2.2	2.9375	1	2	3	5	3.33333	0.249	0.183	0.299	0.526
	32	1	23	2	2	3	4	2	2	3	3	2	2	2	2	5	2	2	4	3	2	3	4	3	2	2	4	2	2	3	2	2	3	2.5	2.2	2	2.5	2.4	2.4	2.33333	1	3	3	3	3	0.266	0.216	0.492	0.666
	36	2	27	3	4	4	2	3	4	4	4	4	3	5	4	2	3	3	3	3	3	3	3	3	3	3	3	3	3	3	3	3	3	3.5	3	3	3.25	3	3.8	3.25833	1	3	4	4	3.66667	0.416	0.333	0.878	0.339
	37	2	23	2	3	3	1	4	4	2	4	5	5	4	4	4	5	4	1	4	4	4	2	4	4	5	3	4	4	2	4	5	4	3.75	4.6	3.33333	3	4.4	3.4	3.74722	1	4	3	3	3.33333	0.283	0.249	0.587	0.528
	38	1	21	2	5	4	2	4	3	4	4	3	3	4	4	2	4	3	2	3	4	3	3	3	4	3	3	2	3	3	4	4	4	3.75	3.8	2.33333	3.5	3.2	3.8	3.39722	1	2	4	3	3	0.333	0.399	0.666	0.433
	39	1	27	3	4	4	2	4	4	4	4	3	4	4	4	3	4	4	3	3	4	4	4	3	4	4	4	3	4	3	4	4	3	4	3.8	2.66667	3.25	3.6	3.8	3.51944	1	3	3	5	3.66667	0.183	0.316	0.618	0.324
	44	2	22	4	4	2	2	4	3	2	3	2	2	4	4	2	4	3	2	3	4	4	4	3	4	4	3	4	4	2	3	4	3	3.25	3.8	3.33333	4	3.2	3.4	3.49722	1	3	3	3	3	0.366	0.249	0.735	0.668
	1	1	28	4	5	4	1	3	5	5	4	2	4	2	5	2	4	4	2	2	3	3	4	1	3	3	2	2	4	2	5	4	3	3.875	3.4	2.66667	4.25	3.2	3.6	3.49861	1	3	5	6	4.66667	0.416	0.283	0.723	0.254
	3	1	24	3	5	4	3	4	4	4	4	4	3	3	4	3	4	4	4	3	4	4	3	3	4	4	4	3	3	5	4	4	4	4	4	3	2.25	3.2	3.6	3.34167	2	2	3	4	3	0.383	0.249	0.194	0.689
	9	2	20	5	4	3	2	4	3	4	4	3	4	5	3	2	5	4	2	4	4	3	2	3	4	4	2	5	4	1	4	4	4	3.375	4.2	4.66667	4	3.6	4.2	4.00694	2	3	4	4	3.66667	0.133	0.233	0.792	0.776
Realistic	1	1	28	3	2	5	1	4	4	3	4	3	4	4	4	2	4	4	2	4	4	4	2	3	4	4	4	3	4	3	4	4	4	4.125	4	3.33333	3.75	3.8	3.4	3.73472	1	6	6	5	5.66667	0.308	0.216	0.664	0.677
Style	3	1	26	1	5	4	2	4	4	5	5	2	4	4	4	2	4	3	2	3	4	4	5	3	4	4	4	2	3	4	5	4	4	4.25	4	1.33333	3.5	3.6	4	3.44722	1	3	3	5	3.66667	0.233	0.299	0.533	1.001
	5	2	29	1	4	3	3	4	2	4	3	2	4	4	2	2	4	2	2	4	4	3	4	2	4	4	3	1	4	2	4	3	4	3.125	3.8	1.33333	3.75	3	4	3.16806	1	2	2	3	2.33333	0.396	0.167	0.677	0.763
	7	1	22	3	4	4	2	4	4	3	5	3	3	4	5	1	4	4	2	2	4	3	2	3	4	4	4	4	4	3	4	4	4	4.25	4	3.66667	3.75	3.4	3.4	3.74444	1	4	5	5	4.66667	0.258	0.233	0.658	1.192
	12	2	28	3	5	3	2	3	3	2	3	3	3	4	4	3	4	3	3	3	4	3	2	4	4	4	3	5	4	2	3	4	4	3.25	4	4	3.5	3.2	3.6	3.59167	1	4	5	6	5	0.316	0.383	1.211	0.681
	14	1	28	4	5	3	1	5	3	3	2	4	1	4	3	2	5	3	5	3	5	2	3	1	5	5	3	4	2	3	4	5	5	3.5	5	3.66667	3.5	1.6	3.4	3.44444	1	4	4	4	4	0.516	0.267	0.828	0.412
	15	2	25	4	5	4	2	4	4	4	3	2	3	3	4	2	4	3	3	3	4	3	2	2	3	3	4	4	4	1	4	5	2	3.875	3.4	4	4.25	2.8	3.8	3.6875	1	3	4	4	3.66667	0.396	0.149	0.839	0.549
	14	2	24	3	4	5	1	2	4	4	5	1	4	4	4	2	4	4	3	4	4	4	3	3	3	4	4	4	4	3	4	4	4	4	3.8	3.33333	4.25	3.6	4	3.83056	1	4	5	6	5	0.233	0.266	0.621	0.759
	11	1	23	2	3	4	1	4	4	4	4	4	3	3	3	2	3	3	3	4	4	4	4	2	4	3	3	2	4	4	3	4	3	3.625	3.4	2	3.25	3	3.6	3.14583	1	2	2	2	2	0.216	0.216	1.163	0.512
	21	1	27	4	5	4	1	4	4	4	5	4	5	5	5	1	4	2	1	3	5	2	2	2	4	4	2	4	3	3	2	5	4	3.875	4.2	4	3.75	3.2	4	3.8375	1	4	6	6	5.33333	0.133	0.283	0.353	1.119
	19	2	25	5	5	5	2	4	2	3	5	2	4	4	5	3	4	3	2	2	5	4	1	3	4	4	4	5	2	3	4	5	3	4.25	4	5	3.5	3.6	3.2	3.925	1	3	3	5	3.66667	0.133	0.233	0.572	0.399
	27	1	23	4	5	4	1	4	4	5	4	4	4	3	4	2	3	4	1	4	5	5	3	4	5	5	2	4	5	1	4	5	5	3.875	4.6	3.66667	4	4.4	4.4	4.15694	1	5	6	7	6	0.433	0.333	0.853	0.432
	30	1	24	2	5	5	1	5	4	3	1	1	3	2	4	2	5	3	3	2	5	4	4	3	4	4	4	2	4	1	3	5	4	3.875	4.4	2	4.75	3.2	3.2	3.57083	1	2	3	5	3.33333	0.167	0.883	0.342	1.126
	31	1	21	3	5	5	1	5	5	4	5	2	4	4	5	3	5	4	3	4	5	5	5	5	5	5	5	3	4	2	5	5	4	5	4.8	2.33333	4	4.2	4.2	4.08889	1	5	6	6	5.66667	0.249	0.283	0.636	0.476
	32	2	26	3	4	5	2	5	4	4	5	4	3	5	5	2	4	3	2	2	4	4	3	2	4	4	5	1	2	3	4	5	4	4.625	4.2	2.33333	3.25	3.2	3.4	3.50139	1	3	5	3	3.66667	0.183	0.299	0.525	0.323
	36	1	28	4	4	4	4	4	3	3	3	4	4	3	4	4	3	3	3	3	4	3	2	3	3	3	2	3	4	3	4	4	4	3.5	3.4	3.66667	2.25	3.2	3.4	3.23611	1	4	4	3	3.66667	0.266	0.299	0.352	0.228
	48	1	24	3	4	5	1	4	4	4	4	2	4	4	4	2	5	4	2	4	4	4	3	3	4	4	4	4	4	2	4	4	3	4.125	4	3.33333	4.25	3.8	4	3.91806	1	5	5	6	5.33333	0.349	0.266	0.437	0.359
	49	2	28	4	4	4	3	4	4	4	4	3	3	4	4	3	4	3	3	3	4	3	3	3	4	3	3	3	3	2	4	4	3	3.875	3.6	3.33333	3.25	3	3.6	3.44306	1	3	3	3	3	0.649	0.366	1.031	1.119
	50	1	29	5	5	3	2	4	4	3	4	5	3	3	4	2	4	3	4	3	5	5	2	4	4	4	4	5	4	3	3	4	3	3.875	3.8	4.66667	3	3.4	3.6	3.72361	1	4	5	5	4.66667	0.183	0.249	0.381	1.128
	51	1	28	3	3	2	2	2	3	3	5	2	2	3	4	3	4	2	1	3	4	2	2	3	4	4	2	3	3	1	4	3	3	3.25	3.6	3.33333	4	2.8	3	3.33056	1	1	4	2	2.33333	0.017	0.283	0.641	0.277
	54	2	29	2	5	3	2	4	4	4	4	4	5	4	4	1	4	4	3	4	2	2	4	4	3	4	4	2	3	5	3	4	3	3.5	3.6	2	3	3.6	4	3.28333	1	4	5	5	4.66667	0.249	0.183	0.429	0.483
	55	1	28	5	5	5	1	5	5	5	5	3	3	3	4	2	3	3	1	1	5	5	2	4	4	4	3	5	4	2	4	4	4	4.5	3.8	4.66667	4	4	3.6	4.09444	1	4	4	4	4	0.183	0.299	0.532	0.606
	4	2	26	3	4	2	1	5	4	3	5	3	4	5	4	2	4	4	2	3	4	4	1	2	4	3	4	4	3	3	3	3	2	3.875	3.2	4	3.75	3.6	3.6	3.67083	1	3	4	3	3.33333	0.449	0.133	0.723	0.294
	10	1	23	5	5	5	2	2	4	3	5	2	1	4	5	2	4	1	2	3	5	5	1	4	4	4	3	3	3	2	4	5	4	4.125	4.2	4.33333	4	3	3.6	3.87639	1	4	4	5	4.33333	0.233	0.249	0.625	0.753
	13	1	21	2	4	3	1	3	4	5	5	3	4	4	3	2	2	4	2	2	3	2	5	2	2	2	2	2	2	4	3	3	1	3.25	2	1.66667	3.5	3.2	3.4	2.83611	2	2	2	3	2.33333	0.249	0.117	0.495	0.463
[truncated: 11 more columns]

## Sheet: EEG (Gamma)
		Iconic Style (0~3000 ms)
Channel & Number		20	40	60	80	100	120	140	160	180	200	220	240	260	280	300	320	340	360	380	400	420	440	460	480	500	520	540	560	580	600	620	640	660	680	700	720	740	760	780	800	820	840	860	880	900	920	940	960
'F7'	1	NaN	NaN	10.3184	5.84889	5.82551	5.95244	6.09812	6.10932	6.06567	5.97249	5.72502	5.17575	4.73409	4.53191	4.48848	4.50076	4.4028	4.45537	4.52712	4.7073	4.81994	5.07741	5.614	5.71745	5.32919	4.81163	4.86945	4.94557	5.019	5.30965	5.73784	6.14994	6.33769	6.11183	5.8755	6.04916	5.95274	5.48682	5.02061	5.09969	5.62538	6.15262	6.3826	6.53702	6.50059	6.20141	5.91392	5.74538
'F3'	2	NaN	NaN	NaN	4.75985	4.78408	4.78601	5.08311	5.35848	5.31027	5.34087	5.36474	4.97986	4.57923	4.31261	4.21951	4.3613	4.701	5.01494	5.25068	5.39604	5.33285	5.412	5.72424	5.62426	5.29742	5.15149	4.9253	4.85403	4.86965	5.30083	5.73571	6.05351	6.1854	6.16098	5.96444	6.1299	6.08091	5.59605	5.15722	5.15716	5.52255	6.08739	6.41031	6.56429	6.47319	6.11982	6.09907	6.07578
'Fz'	3	NaN	NaN	NaN	6.41089	6.4174	6.62737	6.98994	7.19958	7.07117	6.61213	6.00525	5.17975	4.78345	5.0059	5.15079	5.45638	5.82718	6.11356	6.2465	6.37945	6.41593	6.28746	5.96804	5.46891	5.18683	5.34012	5.848	6.40609	6.92989	7.41044	7.59855	7.7273	7.9294	8.42152	8.70555	8.79193	8.63032	8.14093	7.60015	7.25959	6.98478	7.03632	7.17461	7.46091	7.73358	7.91256	7.90784	7.74968
'F4'	4	NaN	NaN	NaN	6.93896	6.98148	6.97863	7.00282	6.9451	6.75874	6.21292	5.71344	5.693	5.47776	5.26917	5.28486	5.43809	6.00113	6.51152	6.79785	6.93949	6.74347	6.36414	5.89309	5.21763	4.82349	4.89762	5.40124	6.16062	6.6724	7.02547	7.19611	7.31147	7.52744	7.81327	7.77793	7.37592	6.66113	6.01512	5.60758	5.3778	5.40711	5.69064	6.32414	6.75724	6.82734	6.77971	6.51284	6.03789
'F8'	5	NaN	NaN	10.0974	5.65058	5.43402	5.47609	5.57749	5.43074	5.17959	4.90604	4.535	4.17349	4.03464	4.00128	4.11606	4.36462	4.45267	4.33906	4.04004	3.73954	3.42061	3.24348	3.61277	3.98563	4.0434	3.73048	3.65242	4.18019	4.67333	4.75004	4.68046	4.78167	4.7067	4.53676	4.65193	4.61089	4.4315	4.51863	4.72317	4.94695	5.12551	5.51843	5.84154	5.86356	5.57876	5.25639	5.00171	4.488
'FT7'	6	NaN	NaN	9.36806	5.10993	4.92615	4.76664	4.67916	4.7169	4.96216	4.95878	4.71477	4.54024	4.60438	4.90111	4.87646	4.49041	3.9869	3.70965	3.66863	3.8248	3.78176	3.5793	3.71258	4.12621	4.27916	3.96151	3.28745	3.00595	3.70348	4.3993	4.84142	5.18405	5.2951	5.27583	5.1218	5.01412	4.94527	5.12413	5.50329	5.60767	5.41571	5.33421	6.06104	6.425	6.543	6.44855	6.15903	5.7212
'FC3'	7	NaN	NaN	10.8102	6.05414	5.92618	6.16878	6.33335	6.14802	5.59431	4.81503	4.0884	4.05057	3.95646	4.14977	4.29225	4.2869	4.29287	4.45001	4.8537	4.99515	4.96246	5.0138	4.86691	4.76253	4.61316	4.38205	4.06652	4.66438	5.18959	5.32654	5.52925	5.54112	5.33593	5.4342	5.87245	6.05617	5.904	5.44236	4.83668	4.42568	4.28491	4.50397	4.63738	4.51544	5.07056	5.63561	5.90119	5.91474
'FCz'	8	NaN	NaN	10.0328	5.36768	4.79871	4.59329	4.83589	5.16279	5.31558	5.2093	4.76307	4.5913	4.28714	4.00226	4.13986	4.41112	4.78351	4.95095	4.85397	5.09165	5.38337	5.58032	5.8804	6.05553	5.7769	5.20095	4.92892	4.78711	4.63434	4.31227	4.42423	4.76006	5.15874	5.54122	5.7582	5.89337	6.04298	6.05208	6.19526	6.63156	6.96756	7.27975	7.46524	7.29978	6.99742	6.44761	5.79383	5.32431
'FC4'	9	NaN	NaN	NaN	6.38221	6.47754	6.49105	6.58469	6.61739	6.39542	5.99036	5.7187	5.68073	5.67567	5.88611	5.96208	5.6811	5.31014	5.15038	4.9584	4.40932	3.90879	3.76292	3.8936	4.36555	4.8091	4.96319	4.7623	4.76869	5.23165	5.56773	5.95009	6.2186	6.34047	6.52529	6.75787	6.87768	6.73456	6.33355	5.80174	5.33744	4.90008	4.66188	4.67474	4.70684	4.87654	5.08847	5.43732	5.51738
'FT8'	10	NaN	NaN	9.44494	5.55982	5.77365	5.84224	5.87286	5.93162	5.97265	5.82101	5.39222	4.98462	4.76396	4.56291	4.55047	4.53617	4.85474	5.23802	5.65377	5.83417	5.60047	5.13891	5.02869	5.25574	5.35444	5.09494	4.69427	4.61012	4.96232	4.94302	4.80456	4.88367	5.16704	5.85725	6.26365	6.27848	5.92589	5.19204	4.39538	3.98254	4.12587	4.58284	5.09272	5.35962	5.55055	5.49683	5.25728	4.94441
'T7'	11	NaN	NaN	9.00995	4.67015	4.60039	4.5515	4.81639	5.03439	5.28407	5.38086	5.24177	5.15154	5.03698	4.70344	4.73164	4.95855	5.15739	5.06513	4.75879	4.45856	4.75576	5.24504	5.31394	5.23904	5.14755	4.8791	4.63521	4.43909	4.73398	5.31724	5.69376	5.64683	5.90862	6.50185	6.83583	6.79733	6.6462	6.51953	6.24655	5.76383	5.5534	5.55106	5.5541	5.72638	5.69693	5.25841	4.77744	4.57583
'C3'	12	NaN	NaN	10.8909	5.91693	5.48905	5.52923	5.56271	5.28364	5.19385	5.10015	5.06559	5.1798	5.14455	4.97242	5.03614	5.29118	5.45053	5.53465	5.5374	5.31893	5.01519	4.4757	3.8146	3.60424	3.60591	3.58254	3.2611	2.89495	3.01986	3.42361	3.59034	3.80364	4.01361	4.15494	3.95509	3.38936	3.09644	3.42781	3.81264	4.5335	5.29919	5.74548	5.90248	5.90627	5.88028	5.85532	5.54288	5.13033
'Cz'	13	NaN	NaN	9.24291	4.93179	4.7027	4.56497	4.29884	4.11248	4.08227	4.01113	3.88911	3.76148	3.47924	3.34804	3.43971	3.28077	3.30652	4.08922	4.48113	4.87274	5.14057	5.45015	5.68724	5.77398	5.55414	4.90756	4.21943	3.94489	3.64061	3.71995	4.23128	4.71112	4.9366	4.92067	5.2294	5.45397	5.43756	5.09958	4.99718	4.91177	4.85072	4.8829	5.09274	5.03149	4.99334	4.88772	4.89879	5.14273
'C4'	14	NaN	NaN	9.38651	4.59602	3.90292	3.73391	4.16134	4.41503	4.70053	4.83988	4.98338	4.84933	4.41431	3.9047	3.77465	3.87986	4.02131	4.2202	4.69273	5.04244	5.20159	5.16891	4.84915	4.8101	5.17137	5.09666	4.64918	4.19482	4.08648	3.89389	3.58524	4.00288	4.57364	4.87988	4.94378	4.75937	4.24423	3.84126	3.67362	3.64329	4.19367	4.64805	4.86822	5.13374	5.4369	5.69391	5.6622	5.32538
'T8'	15	NaN	NaN	9.19783	4.93553	5.00632	4.82828	4.50852	4.48362	4.57791	4.51835	4.33466	3.95972	3.36302	2.82623	2.85302	2.91391	3.16691	3.68519	3.79682	3.65312	4.00844	4.28121	4.36611	4.03938	3.68485	3.66916	3.97703	4.28507	4.34552	4.19075	4.12082	3.99426	3.95449	4.56992	5.31359	5.73285	6.03926	6.16995	6.07985	5.95814	5.71473	5.47938	5.45473	5.43441	5.2365	4.88495	4.42881	4.22697
'TP7'	16	NaN	NaN	7.67899	3.88293	4.28813	4.47555	4.44415	4.45261	4.46365	4.51541	4.76514	4.91614	4.67673	4.47974	4.23309	4.21107	4.22202	4.22589	4.24567	4.29763	4.59017	4.70839	4.51201	4.17705	4.01246	3.86048	4.32758	4.88739	5.03587	4.7526	4.28258	4.01606	4.04141	4.30483	4.3572	4.36716	4.56411	4.74874	4.97916	5.25974	5.47647	5.49647	5.37201	4.92248	4.46258	4.29522	4.20365	4.46001
'CP3'	17	NaN	NaN	7.13514	3.00493	2.98008	3.33265	3.60387	3.92258	4.11146	4.22973	4.25136	4.34534	4.26352	4.05739	3.8742	3.72963	3.4685	3.30471	3.29994	3.34927	3.60654	3.78131	3.9229	4.29765	4.45041	4.47403	4.72338	4.82095	4.72453	4.34559	4.00704	4.09346	4.17154	4.27589	4.42131	4.19184	4.03688	4.03911	3.93658	3.69118	3.35217	2.85262	2.27689	1.85422	1.55309	1.87282	2.56814	3.16318
'CPz'	18	NaN	NaN	10.5235	5.86393	5.80981	5.88502	5.94327	5.77662	5.64371	5.73917	5.9346	5.85022	5.69568	5.3567	4.85897	4.70514	4.69264	4.72191	4.98713	5.13137	4.94406	4.54281	4.22181	4.03775	4.06216	3.89609	3.4385	2.86428	2.85435	3.10869	3.07599	2.94045	3.38548	3.93918	4.46653	4.92651	5.02985	4.75623	4.23564	4.06948	4.32538	4.71277	5.24696	5.64512	5.79249	5.68848	5.46836	5.22331
'CP4'	19	NaN	NaN	8.41572	3.18079	2.5957	2.86877	3.14527	3.26809	3.37078	3.30686	3.58753	4.15917	4.58639	4.62602	4.48115	4.36212	4.56352	4.91009	5.10258	5.02295	4.86472	4.86076	4.77678	4.46183	4.4921	4.6832	4.62786	4.35402	3.64837	3.23935	3.27342	3.31116	3.21366	3.17766	3.15368	3.16404	3.47753	3.84974	4.4727	4.93917	5.13515	5.2031	5.31063	5.36196	5.20928	4.89815	4.89734	4.70347
'TP8'	20	NaN	NaN	8.00267	4.07923	4.13223	4.25438	4.22378	3.97756	3.74239	3.56637	3.16533	2.7927	2.70327	2.84155	3.2459	3.74072	4.07313	4.30345	4.31261	4.07812	4.02709	4.23739	4.34165	4.44425	4.48058	4.30589	3.91978	3.24863	2.56309	2.02813	2.28014	2.41232	2.36901	2.59082	3.16002	3.35833	3.40269	3.63311	4.08557	4.52268	4.58475	4.50948	4.61255	4.78433	4.65929	4.163	3.74744	3.22988
'P7'	21	NaN	NaN	10.1527	5.66412	5.51606	5.74221	6.00938	6.09024	5.95676	5.59255	5.30908	5.04911	4.75931	4.57583	4.33652	3.82559	3.43694	3.44567	3.44499	3.56683	3.99893	4.31914	4.51311	4.75647	4.6761	4.35812	3.88494	3.34196	2.92781	2.8814	3.18623	3.67424	3.91299	3.92373	3.92609	3.82189	3.74146	3.95186	4.40498	5.00622	5.57433	5.94005	6.2825	6.48386	6.40674	6.10082	5.78094	5.59291
'P3'	22	NaN	NaN	9.78218	5.11181	5.03915	5.19482	5.32289	5.23866	5.01899	4.94899	4.87476	4.74353	4.71192	4.54657	4.22044	3.80283	3.50876	3.51825	3.81614	4.22925	4.611	4.85998	4.97271	4.8255	4.658	4.51634	4.09815	3.353	3.00321	2.86445	2.95052	3.44581	3.94286	4.10265	4.1088	4.03677	3.84858	3.91834	4.17114	4.61054	4.96896	5.00135	5.18566	5.38276	5.32799	5.06781	4.69285	4.6831
'Pz'	23	NaN	NaN	10.0291	4.4919	3.90976	4.21467	4.52049	4.57384	4.52843	4.74733	4.90008	4.87843	4.70131	4.40426	4.18379	3.91355	3.9332	4.43511	4.95703	5.18245	5.02172	4.48858	4.02464	3.81967	3.90305	4.0782	4.10039	3.8009	3.56753	3.56789	3.6672	3.37223	2.87127	2.4514	2.54936	2.89558	3.0782	3.37912	3.9173	4.40191	4.8026	4.92461	4.85513	4.72348	4.46115	4.58974	4.99496	5.35028
'P4'	24	NaN	NaN	7.98692	2.85112	2.14208	2.18257	2.56748	2.80942	2.92049	3.15871	3.60797	4.05873	4.29977	4.35716	4.29183	4.09154	3.72142	3.2566	2.89723	2.9864	3.18456	3.54525	3.95284	4.4556	4.8309	5.0871	5.19553	4.97256	4.42123	3.60115	2.7154	2.63954	2.63561	2.75225	3.05442	3.2873	3.33748	3.09555	2.70931	2.64061	2.88994	2.92158	2.74371	2.7191	2.65177	2.66801	2.63436	2.62157
'P8'	25	NaN	NaN	10.8998	6.1426	6.03571	5.94993	5.8276	5.70389	5.38743	5.13699	5.24941	5.12284	4.89299	4.75904	4.38862	4.04936	3.95856	4.09387	4.25807	4.34767	4.43784	4.45277	4.11793	3.92531	3.81304	3.56815	3.68221	3.90874	3.77911	3.35517	3.13264	3.08704	3.14387	3.32115	3.33314	3.27502	3.35396	3.58832	3.89105	4.09632	4.50901	4.76863	4.77844	4.94663	5.08007	5.16697	5.08754	5.05077
'O1'	27	NaN	NaN	8.64844	4.59559	4.8525	4.83168	4.81031	4.88285	4.70603	4.43508	4.05152	3.94203	3.99371	3.88236	3.44668	3.26635	3.52341	3.60336	3.47631	3.26295	3.29991	3.58214	4.13959	4.37158	4.28465	4.27082	4.12753	3.97419	3.86558	3.62631	3.22449	2.48301	2.40088	3.09694	3.80724	4.16749	4.2339	4.37031	4.47711	4.24913	3.59719	2.82415	2.29288	2.59307	2.99026	3.17818	3.20193	3.32348
'Oz'	28	NaN	NaN	9.09865	4.58976	4.2347	4.26825	4.50059	4.76253	5.04968	5.10718	5.10862	5.33257	5.47549	5.34124	4.93026	4.50199	4.0554	3.84829	3.62404	3.44177	3.38261	3.75419	4.01152	4.14956	4.33813	4.56902	4.62468	4.27234	3.69388	3.27374	3.06935	3.18246	3.60253	4.0751	4.11191	3.92774	3.69012	3.782	4.11337	4.40078	4.62084	4.7502	4.82409	5.0677	5.4357	5.63044	5.61979	5.36463
'O2'	29	NaN	NaN	8.37477	4.31538	4.41497	4.50818	4.75715	5.06226	5.34242	5.45863	5.23934	4.81088	4.78436	4.87153	4.5484	4.23412	4.12312	3.97171	3.73051	4.32681	4.81454	4.99599	4.81511	4.45118	4.37047	4.54938	4.68265	4.65844	4.24971	3.7652	3.74989	4.10791	4.36202	4.50268	4.78791	4.99274	4.88785	4.62712	4.38987	4.07613	3.7163	3.71548	4.24477	4.73253	4.93283	5.13005	5.25264	5.32427
		Realistc Style (0~3000 ms)
Channel & Number		20	40	60	80	100	120	140	160	180	200	220	240	260	280	300	320	340	360	380	400	420	440	460	480	500	520	540	560	580	600	620	640	660	680	700	720	740	760	780	800	820	840	860	880	900	920	940	960
'F7'	1	NaN	NaN	9.2942	4.82448	4.87815	4.70862	4.62536	4.4628	4.37039	4.56947	4.52393	4.23772	4.14942	3.95557	3.42916	3.18366	3.18348	3.60337	4.43022	5.02456	5.31936	5.32201	5.01192	4.61083	4.1256	3.84045	3.94823	4.31676	4.80801	5.07061	5.19028	5.08083	4.71426	4.30577	3.92855	3.78809	3.8364	3.76296	3.51801	3.71502	4.32206	4.98912	5.54007	5.77277	6.03619	6.39255	6.51971	6.35632
'F3'	2	NaN	NaN	NaN	4.11559	4.32312	4.50951	4.43593	4.38082	4.43046	4.58944	4.66153	4.68143	4.42174	3.95879	3.3734	3.09989	2.95975	2.97166	3.73506	4.48351	4.92589	5.06601	4.95738	4.76925	4.40809	4.07538	4.1608	4.61052	4.8337	4.89796	4.70663	4.11781	3.74069	3.73557	3.93469	4.0591	4.14499	4.15062	4.16425	4.51417	4.79257	4.9924	5.17772	5.45216	5.70438	5.88909	6.04879	6.04037
'Fz'	3	NaN	NaN	NaN	5.14484	4.95599	4.99212	5.11061	5.08624	5.22065	5.5964	6.04297	6.20936	6.29223	6.21831	5.88697	5.53604	5.2432	5.00211	5.02639	5.199	5.4354	5.71288	5.7363	5.8182	5.69553	5.88292	5.89967	5.82228	5.70738	5.64493	5.68714	5.5278	5.62938	6.26386	6.64061	6.64991	6.30024	5.74248	5.54231	5.68668	5.64292	5.48774	5.5799	5.50476	5.47417	5.4653	5.48862	5.84402
'F4'	4	NaN	NaN	NaN	5.35623	5.49358	5.77087	5.94009	6.0263	5.9392	5.76162	5.53219	5.53499	5.14607	4.85624	4.5577	4.028	4.42964	5.07654	5.47111	5.94327	6.49142	6.87487	7.0621	6.99609	6.71822	6.34264	6.10252	5.80017	5.52226	5.44564	5.49892	5.55581	5.68185	6.25888	6.78261	7.02961	7.01755	6.72642	6.40256	6.14349	5.86471	5.99903	6.13598	6.3121	6.52309	6.48915	6.26488	5.90184
'F8'	5	NaN	NaN	7.86972	3.74034	3.97519	4.35661	4.72562	5.06688	5.61726	6.05437	6.21533	6.06746	5.92115	5.87272	5.59885	5.15495	4.93572	4.68038	4.6004	4.60055	4.62805	4.70731	4.68811	4.63263	4.29662	3.90694	3.83312	3.80908	4.21378	4.83371	5.23451	5.27984	4.95074	4.63433	4.56501	4.69646	4.80305	5.05383	5.51324	5.73523	5.82917	5.90452	5.92186	6.06105	6.21782	6.45104	6.74965	6.88242
'FT7'	6	NaN	NaN	8.53768	4.66882	4.86785	5.24116	5.71319	6.20007	6.5765	6.6599	6.56452	6.50456	6.42487	6.33413	6.27726	6.09823	5.81757	5.80835	5.82212	5.88665	6.00403	5.96438	5.96743	5.90599	5.56126	5.14261	5.08498	5.10533	5.11304	5.05903	4.89148	4.8072	4.82172	5.03317	5.42738	5.66118	5.66116	5.46739	5.72934	6.15513	6.39627	6.48917	6.36126	6.12754	6.10864	6.16198	6.02138	5.72658
'FC3'	7	NaN	NaN	9.86919	5.34271	5.35793	5.40424	5.50238	5.57784	5.64417	5.86738	6.16392	6.19628	6.0087	5.70533	5.26409	5.03668	4.78341	4.6298	4.72157	4.88591	5.08797	5.23659	5.35835	5.46118	5.49255	5.30317	5.19433	5.2504	4.97073	4.76399	4.94534	5.04593	4.88189	4.76648	4.70377	4.27459	4.3734	5.27684	5.9901	6.32697	6.30016	6.24496	6.45664	6.71335	6.81723	6.85163	6.8805	7.06309
'FCz'	8	NaN	NaN	9.3956	4.41126	4.26252	4.3468	4.22199	4.17955	4.37757	4.45287	4.68765	4.74807	4.46567	4.18905	4.14567	4.10592	4.23314	4.39204	4.66765	5.15939	5.44458	5.50248	5.52324	5.48771	5.21668	4.98979	4.77362	4.45946	4.25715	4.40672	4.40412	4.03462	3.91959	3.91878	3.86072	4.0909	4.43582	4.61319	4.81925	5.12818	5.35229	5.53629	5.69354	5.49973	5.22584	5.29636	5.35985	5.47089
'FC4'	9	NaN	NaN	NaN	4.50542	4.50432	4.69943	4.96822	5.58719	6.07759	6.18439	6.05051	5.86049	5.62979	5.41117	5.29984	5.2127	5.21986	5.14373	4.9303	5.05002	5.22055	5.10197	5.03608	4.95595	4.97351	4.92566	4.87332	4.71389	4.77976	5.05194	5.2954	5.39286	5.39835	5.33828	5.55225	5.76213	5.80578	5.78953	6.26815	6.49254	6.54405	6.61933	6.4788	6.09341	5.80362	5.51674	5.45494	5.33846
'FT8'	10	NaN	NaN	8.61993	4.16606	4.28245	5.06362	5.69354	6.08498	6.31353	6.48006	6.39104	6.01225	5.39831	4.66428	4.41079	4.86404	5.2598	5.5655	5.69835	5.73569	5.75652	5.93828	6.10264	6.02301	5.52425	5.21353	5.14681	5.03488	5.05783	5.27903	5.4238	5.62966	5.888	5.92284	6.3866	7.02247	7.30575	7.2782	7.14025	6.89619	6.59063	6.3435	6.32883	6.54036	6.68503	6.65072	6.43739	6.23812
'T7'	11	NaN	NaN	10.425	5.63274	5.63834	5.84611	5.79141	5.40698	5.05459	4.9122	4.70943	4.81576	4.89484	4.55916	3.95118	3.69535	3.92259	4.22031	4.62906	4.87202	5.09579	5.51476	5.73883	5.59708	5.51651	5.33182	5.11561	4.81794	4.18382	3.88987	3.87344	3.70085	3.91632	4.42969	5.09895	5.91039	6.46179	6.77601	6.86585	6.74297	6.50081	6.36897	6.41148	6.58482	6.71551	6.6846	6.47867	6.15553
'C3'	12	NaN	NaN	8.86614	3.96539	4.1868	4.55908	4.67972	4.98273	5.41131	5.76697	5.86386	5.95561	6.19766	6.21238	6.00292	6.05833	5.92084	5.49038	5.37636	5.7322	5.85246	5.7349	5.77643	5.62731	5.40162	5.31015	5.18645	5.04461	5.03421	5.20609	5.56263	5.8338	5.83739	5.65314	5.65548	5.74969	5.61847	5.29475	5.64143	6.09654	6.50615	6.7408	7.00699	7.20981	7.22301	7.2125	7.27178	7.28751
'Cz'	13	NaN	NaN	10.3768	5.58996	5.21315	4.91032	4.50776	3.85139	3.63598	3.92921	4.10439	4.02785	4.14451	4.15452	4.28737	4.66984	4.94306	5.44534	6.10628	6.47599	6.55628	6.39005	6.09912	5.95002	5.65292	5.26791	4.8872	4.68073	4.39091	3.84299	3.63596	3.62957	3.64237	3.7544	4.21763	4.79592	5.0377	4.96925	5.05981	5.25559	5.26813	5.11482	5.13995	5.41285	5.49963	5.81272	6.22449	6.32483
'C4'	14	NaN	NaN	9.34431	4.84468	4.86569	5.45524	5.79636	5.79345	5.66133	5.74304	5.83995	5.59109	5.145	4.86883	4.60646	4.86651	5.22515	5.39173	5.55599	5.57082	5.611	5.60918	5.33954	4.9396	5.00325	5.14485	5.21889	5.30614	5.13464	4.86492	4.74365	4.67662	4.55572	4.49567	4.53804	4.84609	5.24125	5.48418	5.71022	5.6899	5.75046	5.90699	5.78284	5.40946	4.77946	4.47045	4.61247	5.14766
'T8'	15	NaN	NaN	8.83631	4.47279	4.45798	4.65807	4.67108	4.61938	4.62745	4.77486	4.77891	4.6965	4.46714	4.19449	4.01274	4.11733	4.26355	4.22863	4.35533	4.42463	4.26804	4.46545	4.81514	4.80242	5.03198	5.17124	5.03211	4.78535	4.46508	4.21312	4.22861	4.32963	4.30844	4.18643	4.67823	5.54772	6.15088	6.47852	6.54611	6.37454	6.30043	6.30655	6.21376	6.24701	6.29595	6.11088	5.91547	5.898
'TP7'	16	NaN	NaN	9.49714	4.80969	4.70954	4.88616	4.92851	4.78416	4.44223	4.06789	3.75327	3.91276	4.02855	4.14459	4.05135	4.10006	4.26086	4.4422	4.59922	4.62182	4.99494	5.34504	5.47522	5.54031	5.78219	5.95063	5.75295	5.55042	5.16608	4.6396	4.44814	4.07315	3.55151	3.45209	3.92265	4.66556	5.12496	5.17684	5.2163	5.35653	5.50412	5.46469	5.25394	5.19973	4.93759	5.03403	5.20545	5.26559
'CP3'	17	NaN	NaN	9.24272	4.30164	4.08447	4.03308	3.89909	3.62104	3.2913	3.62455	3.76061	3.66327	3.86239	4.02066	4.05251	4.13883	4.22091	4.61084	5.00544	5.17222	5.21599	5.20376	5.22357	5.16727	4.93507	4.37363	3.61457	3.36045	3.45043	3.69428	4.10709	4.53323	4.72751	4.5736	4.48678	4.35151	4.13556	3.96582	3.72138	3.50737	3.3392	3.38044	3.5448	3.8232	3.94713	4.03463	4.34745	4.7536
'CPz'	18	NaN	NaN	9.27832	5.0922	5.46584	5.93917	6.18713	6.25031	6.27428	6.26443	6.20785	5.89145	5.32416	5.12709	5.12897	5.27368	5.29595	5.29563	5.12668	4.8219	4.64355	4.60065	4.31793	3.80448	3.64046	3.84705	3.86489	3.86846	3.67881	3.54207	3.86828	4.16592	4.25798	4.23107	3.8165	3.93144	4.5082	4.94674	5.51002	5.7381	5.84441	5.99476	5.85211	5.64398	5.63973	5.96555	6.15171	6.08944
'CP4'	19	NaN	NaN	11.0403	5.79575	5.43116	5.59258	5.54232	5.44726	5.43383	5.31205	5.18109	5.09514	5.06401	5.03385	5.09453	5.37365	5.44596	5.48778	5.87858	6.36781	6.83707	7.21208	7.36918	7.3414	7.15301	6.82063	6.37062	5.95894	5.5245	5.39653	5.46729	5.49121	5.68661	5.69766	5.48295	5.3637	5.64915	5.92875	5.94139	5.77546	5.75854	5.73881	5.46543	4.83358	4.42508	4.51132	4.63106	5.13014
'TP8'	20	NaN	NaN	9.89365	5.19295	4.66177	3.97943	3.35787	2.96872	2.84581	2.68793	2.39552	2.37283	2.23648	2.1236	2.41951	2.84527	3.48023	4.11658	4.51519	5.09937	5.71181	6.14336	6.33165	6.28786	6.02854	5.77848	5.4929	5.07322	4.5323	4.01085	3.72755	3.52186	3.71291	3.97649	4.15178	4.39667	4.80499	5.08435	5.3043	5.48936	5.55517	5.41784	5.01673	4.51228	4.35987	4.56717	4.80373	5.27895
'P7'	21	NaN	NaN	8.31746	4.23487	4.35385	4.8736	5.4538	5.75221	5.93557	5.83821	5.44454	5.09425	4.97031	5.11053	5.4416	5.87001	6.13975	6.26629	6.38232	6.47855	6.40598	6.05746	5.78835	5.7002	5.40985	5.34857	5.39482	5.44984	5.70288	5.81623	5.62076	5.48529	5.37161	5.20421	5.03212	4.76895	4.68994	4.58894	4.92252	5.27501	5.42474	5.55478	5.6798	5.75716	5.81345	5.57657	5.28316	5.07705
'P3'	22	NaN	NaN	10.2409	5.57116	5.81017	6.0399	6.19403	6.1767	6.17502	6.29846	6.42104	6.39211	5.99494	5.44468	4.95576	4.54056	4.80884	5.40352	5.85984	6.16922	6.48618	6.70488	6.79474	6.73909	6.4917	6.03077	5.41524	5.02338	4.92542	5.05866	5.2755	5.33841	5.18304	4.93663	4.91505	4.84143	5.08401	5.68568	6.06552	6.32118	6.44239	6.58084	6.73595	6.79952	6.78881	6.76135	6.51525	6.35304
'Pz'	23	NaN	NaN	9.91242	5.17614	5.10361	5.28985	5.29985	5.08663	5.09108	5.56167	5.82327	6.04803	6.13266	5.91557	5.78571	5.85985	5.95747	6.08087	6.08837	6.13634	6.17621	6.32262	6.40135	6.21629	6.09608	5.98649	5.93198	5.79781	5.63518	5.5701	5.32684	5.02414	4.72694	4.86279	5.26267	5.62849	5.84503	6.14351	6.39255	6.63764	6.75896	6.68336	6.65098	6.79322	6.90314	6.78784	6.72287	6.87449
'P4'	24	NaN	NaN	8.6207	4.46631	4.54354	4.61892	4.65118	4.53695	4.37474	4.35846	4.06533	3.71251	3.77464	4.09076	4.44848	4.47381	4.46994	4.79272	5.18432	5.57822	5.75113	5.65818	5.30014	4.88812	4.34505	3.54056	3.17883	3.45318	3.75741	4.05262	4.30947	4.48856	4.57053	4.54774	4.3752	3.86791	3.23567	2.7793	2.67309	3.06813	3.44151	3.63101	3.83962	3.86153	3.49777	3.64793	4.49414	5.08503
'P8'	25	NaN	NaN	10.7534	5.92593	5.81663	5.94013	6.02385	5.86669	5.67106	5.45767	5.23915	5.02011	5.00769	5.24028	5.77352	6.25957	6.56459	6.90863	7.20047	7.29674	7.21193	6.95983	6.54636	5.97618	5.52286	5.41158	5.07711	4.57703	4.03634	3.30512	3.38967	4.1673	4.78759	5.10052	5.16804	5.12365	5.23227	5.36723	5.60725	6.02695	6.34305	6.47961	6.48816	6.59822	7.02737	7.31165	7.35015	7.13865
'O1'	27	NaN	NaN	7.09537	2.28607	2.69835	3.34957	3.75309	3.86293	3.63293	3.43935	3.15218	2.6653	2.31206	2.19239	2.37574	2.63304	3.10827	3.48653	3.75689	3.86227	3.83267	3.88269	3.76172	3.97186	4.00885	4.02111	4.07971	3.96797	3.73854	3.4901	3.7166	4.07404	4.14415	4.05345	3.99881	3.88198	3.45304	3.31786	3.43116	3.30984	3.04431	2.99611	3.08834	3.3713	3.9196	4.34031	4.76998	4.85907
'Oz'	28	NaN	NaN	9.57877	4.95718	5.03539	5.49106	6.01509	6.38854	6.69203	6.77001	6.61593	6.24731	5.63632	5.05227	5.01234	4.98556	5.10548	5.46373	5.86549	6.10085	6.35829	6.72109	6.96034	7.06375	7.00709	6.77978	6.38657	5.87059	5.21191	4.34913	4.05529	4.60003	5.0654	5.25526	5.11957	5.11904	5.17734	5.53531	6.17044	6.6453	6.82462	6.93419	7.09143	7.09846	6.96068	6.84978	6.66793	6.40515
'O2'	29	NaN	NaN	10.4641	5.77644	5.70899	5.60661	5.39994	5.31495	5.10707	5.20738	5.5071	5.62084	5.77307	6.06469	6.32734	6.41207	6.42015	6.70511	6.95147	6.98222	7.06155	7.1463	7.02153	6.95749	6.88191	6.63142	6.17159	5.67281	5.48454	5.34445	5.3972	5.52845	5.66144	5.82856	5.97314	5.8975	5.66994	5.7053	5.63571	5.68625	5.98205	6.43979	6.82807	6.92709	6.83244	6.67804	6.53918	6.74517
[truncated: 102 more columns]
